# Supplementary material for: Melioidosis fatalities in captive slender-tailed meerkats (Suricata suricatta): combining epidemiology, pathology and whole-genome sequencing supports variable mechanisms of transmission with one health implications
Source: PubMed Central journal article supplement (PMC6921467; doi:10.1186/s12917-019-2198-9), 2019-12-19
Supplement: 12917_2019_2198_MOESM1_ESM.pdf [file 12917_2019_2198_MOESM1_ESM.pdf]

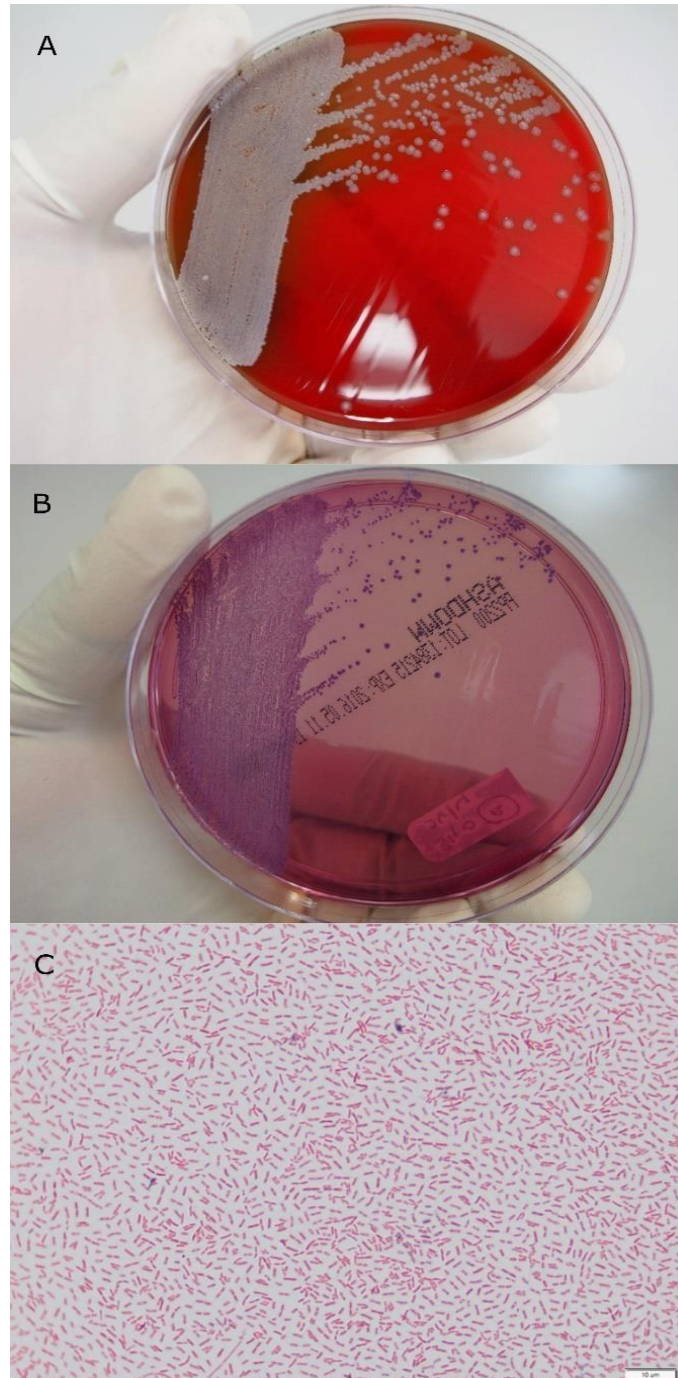

**Supplementary data- Figure S1- Clinical microbiological detection of *B. pseudomallei* in meerkats *B. pseudomallei* growth on Sheep's Blood Agar (A.), and growth on selective Ashdown Agar (B.) Gramnegative bacilli characteristic of *B. pseudomallei* as seen by Gram-stain (C.) (bar = 10μm).**
